# Supplementary material for: Elaborately tailored NiCo2O4 for highly efficient overall water splitting and urea electrolysis
Source: Royal Society of Chemistry journal article supplement (doi:10.1039/d3gc01828h), 2023-01-01
Supplement: d3gc01828h1.pdf [file d3gc01828h1.pdf]

## Elaborately tailored NiCo<sub>2</sub>O<sub>4</sub> for highly efficient overall water splitting and urea electrolysis

Yamei Wang <sup>a</sup>, Lanli Chen <sup>b, c</sup>, Huaming Zhang <sup>a,\*</sup>, Muhammad Humayun <sup>b</sup>, Junhong Duan <sup>a</sup>,  
Xuefei Xu <sup>d</sup>, Yanjun Fu <sup>a</sup>, Mohamed Bououdina <sup>b</sup>, Chundong Wang <sup>d,b,\*</sup>

<sup>a</sup> Jiangxi Province Key Laboratory of Optoelectronic Information Science and Technology,  
Nanchang Hangkong University, Nanchang 330063, Jiangxi, China

<sup>b</sup> Energy, Water and Environment Lab, College of Humanities and Sciences, Prince Sultan  
University, Riyadh 11586, Saudi Arabia

<sup>c</sup> School of Mathematics and Physics, Hubei Polytechnic University, Huangshi 435003, PR China

<sup>d</sup> School of Integrated Circuits, Wuhan National Laboratory for Optoelectronics, Huazhong  
University of Science and Technology, Wuhan 430074, P.R. China

Email: [70451@nchu.edu.cn](mailto:70451@nchu.edu.cn) (H.M. Zhang); [apcdwang@hust.edu.cn](mailto:apcdwang@hust.edu.cn) (C.D. Wang)

---

\* Corresponding authors [70451@nchu.edu.cn](mailto:70451@nchu.edu.cn) (H.M. Zhang); [apcdwang@hust.edu.cn](mailto:apcdwang@hust.edu.cn) (C.D. Wang)

## **1. Experimental materials and calculation methods**

### **1.1 Chemical Materials**

Commercial products of Pt/C (20 wt.% Pt on Vulcan XC-72R) were received from Sigma Aldrich and RuO<sub>2</sub> catalysts were obtained from Aladdin Co., Ltd. Shanghai China. Nickel foam (NF) with a density of 0.29 g cm<sup>-3</sup> and 120 pores per inch (SEM images with thickness of 1 mm) was obtained from the Kunshan Zhenyuhongxin Materials Co., Ltd. China. Ruthenium (III) chloride hydrate (RuCl<sub>3</sub>·xH<sub>2</sub>O, purity 99.9%, Ru content 35-42%), ammonium fluoride (NH<sub>4</sub>F), urea (CO(NH)<sub>2</sub>), and cobalt-(II) nitrate hexahydrate (Co(NO<sub>3</sub>)<sub>2</sub>·6H<sub>2</sub>O) were ordered from Aladdin Company. The Beijing Chemicals Reagent Factory, ethanol (CH<sub>3</sub>CH<sub>2</sub>OH), and hydrochloric acid (HCl, ca. 36-38%). Millipore system was utilized to produce the deionized (DI) water for the tests. All chemicals utilized were of an analytical standard and used as received.

### **1.2 Characterization**

Several analytical methods were used to characterize the as-obtained sample's compositions and microstructures. X-ray diffraction (XRD) technique was used to characterize the crystal phases of the catalysts in the range of 10-80° (10° min<sup>-1</sup> scan rate). The morphology was studied using both a field-emission scanning electron microscope (Zeiss-G-300, FESEM) and a transmission electron microscope (TEM; FEI-Tecnai-TM G2F30). The sample's microscopic morphology and microstructure were explored via the high-resolution TEM (HR-TEM) and high angle-annular dark-field scanning TEM (HAADF-STEM). All electrocatalyst's chemical compositions and states were verified via the X-ray photoelectron spectroscopy ((XPS) using the Al K $\alpha$  X-ray source (providing photons with 1486.6 eV). The pore distribution and N<sub>2</sub> adsorption/desorption isotherms were measured with an ASAP2460 equipment. The amounts of

Ru, Co, Ni and O in catalysts were determined by Inductively Coupled Plasma Optical Emission Spectrometry (ICP-OES, Agilent ICPOES 720ES).

### 1.3 Electrochemical measurement

The CHI-760E electrochemical workstation (Chenhua Instruments, Shanghai, China) was used to conduct the tests on a typical three-electrode setup for the electrochemical analysis. Working electrode was the as-prepared catalyst ( $1 \times 1 \text{ cm}^2$ ), a graphite rod was employed as the counter electrode, and Hg/HgO saturated KOH as the reference electrode. After cycling 30 times to produce a steady cyclic voltammetry (CV) curve, the polarization curves of the catalysts were analyzed using linear-sweep voltammetry (LSV) at a scan rate of  $1 \text{ mV s}^{-1}$ . For all polarization curves presented in the paper, the  $iR$  values were 95% manually corrected with the series resistance ( $R_s$ ) on the basis of the equation:  $E_{RHE} = E_{Hg/HgO} + 0.059pH + E_{Hg/HgO}^{\circ} - iR_s$ , with  $E_{Hg/HgO}^{\circ} = 0.098 \text{ V}$  versus SHE, where the compensated ohmic  $R_s$  values were obtained from the fittings of electrochemical impedance spectra. The Tafel's equation  $\eta = b \log j + a$ , where  $b$  is the slope and  $j$  is the current density, can be used to learn more about the reactions' mechanism. In order to perform electrochemical-impedance spectroscopy (EIS) studies, the potential scanning was halted at varying potentials, and the resulting impedance-spectra were recorded throughout a frequency range of 1 MHz to 0.01 Hz. In addition, the non-faradaic potential regions' double-layered capacitance ( $C_{dl}$ ) was used to predict the electrochemical active-surface-areas (ECSA), and the value of ECSA is given by the equation  $ECSA = C_{dl}/C_s$  with  $C_s \approx 0.04 \text{ mF cm}^{-2}$ . Herein, by plotting the capacitive currents ( $\Delta j = j_{anodic} - j_{cathodic}$ ) versus the corresponding scan rates, the  $C_{dl}$  can be predicted as a half of the slope. The stability of these as-prepared catalysts was tested by chronopotentiometric method.

Calculation of TOF:

The Turnover frequency (TOF) is a relevant and useful kinetic parameter to explore the intrinsic activity of catalysts. Based on following assumption: i) All metal ions in the catalysts are active and contributed to the catalytic reaction (the lowest TOF values), ii) Active sites are uniformly distributed in the catalyst, TOFs for OER and HER were calculated with the following equations:

$$TOF = \frac{j(\eta) \times A}{n \times F \times m}$$

where “ $j(\eta)$ ” is the measured current density ( $A \cdot cm^{-2}$ ) at an overpotential of  $\eta$ , “ $A$ ” is the surface area of the integrated electrode ( $1 \text{ cm}^2$ ), “ $n$ ” is the number of transferred electrons to generate a molecule of product ( $n = 4$  for OER,  $n = 2$  for HER), “ $F$ ” stands for the Faraday constant ( $96485 \text{ C mol}^{-1}$ ), “ $m$ ” is the number of participating atoms or active sites in the as-prepared samples, which was determined based on ICP-OES.

#### 1.4 Theoretical calculations

The Vienna ab *initio* simulation software (VASP) was used to run the simulations, which were based on a plane wave density functional<sup>1,2</sup>. The generalized gradient approximation (GGA) of Perdew-Burke-Ernzerhof (PBE) was used to deal with the exchange-correlation section of the density functional, and the corresponding potentials were of the projector augmented wave (PAW) sort<sup>3,4</sup>. The  $NiCo_2O_4$  (110) surface was modeled using a  $4 \times 4 \times 1$  Monkhorst-Pack k-point mesh with Gaussian smearing of  $0.15 \text{ eV}$  and a plane-wave energy cutoff of  $450 \text{ eV}$ . The energies have converged to a value of  $10^{-5} \text{ eV/unit cell}$ . Lower than  $0.02 \text{ eV/\AA}$  convergence was achieved for the Hellman-Feynman forces. To prevent layer-to-layer interactions, we settled on a  $15 \text{ \AA}$  thick z-axis vacuum. The base is held steady while the other layers are allowed to relax up.

The adsorption energy ( $E_{\text{ads}}$ ) was calculated as  $E_{\text{ads}} = E_{\text{adsorbed}} - E_{\text{pristine}} - E_{\text{adsorbate}}$ , where  $E_{\text{adsorbed}}$ ,  $E_{\text{pristine}}$ , and  $E_{\text{adsorbate}}$  are the total energies of the adsorbed system, the pristine system, and the adsorbate, respectively.

The following formula is used to calculate the free energies:  $\Delta G = \Delta E + \Delta E_{\text{ZPE}} - T\Delta S$ , where  $\Delta E$ ,  $\Delta E_{\text{ZPE}}$ , and  $\Delta S$  respectively denote the binding energy, zero-point energy change, and the entropy variation of the adsorption of adsorbates.

Calculation method of HER activity:  $H^+ + e^- + * \rightarrow H^*$ , where \* represents the adsorption site. The computational hydrogen electrode model developed by Norskov was used to calculate the  $\Delta G$  of the electrochemical elementary step.  $\Delta G_{H^*} = \Delta E_{H^*} + \Delta E_{\text{ZPE}} - T\Delta S_H$ , where  $\Delta E_{H^*}$  represent the energy difference of hydrogen adsorption by DFT calculation.  $\Delta E_{\text{ZPE}}$  represents the difference between the zero-point energy of adsorbed hydrogen and gas phase hydrogen.  $T\Delta S$  is the change of entropy at 298 K.

## References

- 1 G. Kresse, J. Hafner, Ab initio molecular dynamics for liquid metals, *Phys. Rev. B* 47 (1993) 558(R).
- 2 G. Kresse, J. Furthmuller, Efficiency iterative schemes for ab initio total-energy calculations using a plane-wave basis set, *Phys. Rev. B* 54 (1996) 11169-11186.
- 3 J. P. Perdew, K. Burke, M. Ernzerhof, Generalized gradient approximation made simple, *Phys. Rev. Lett.* 77 (1996) 3865-3868.
- 4 P. E. Blochl, Projector augmented-wave method, *Phys. Rev. B* 50 (1994) 17953-17979.

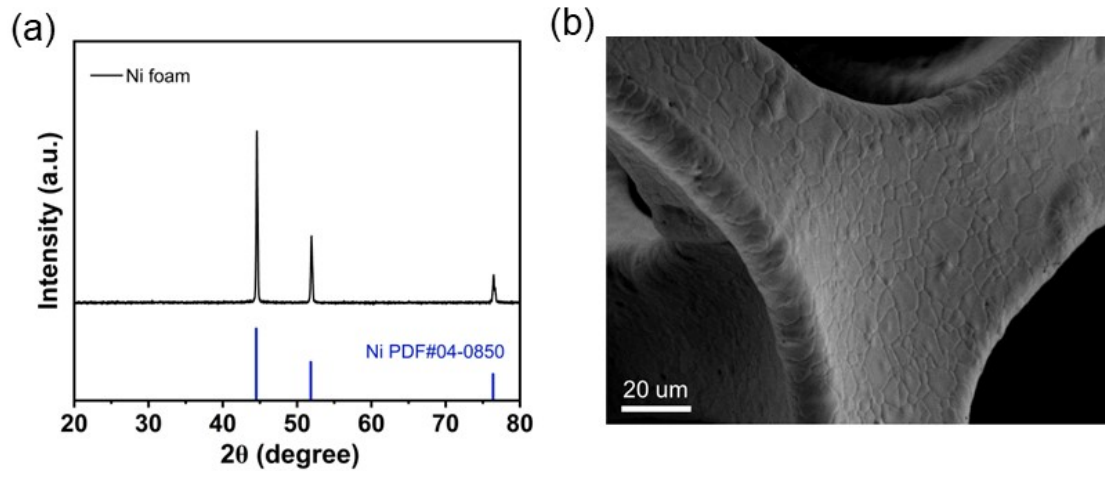

**Figure S1.** (a) XRD patterns and (b) SEM image of bare NF.

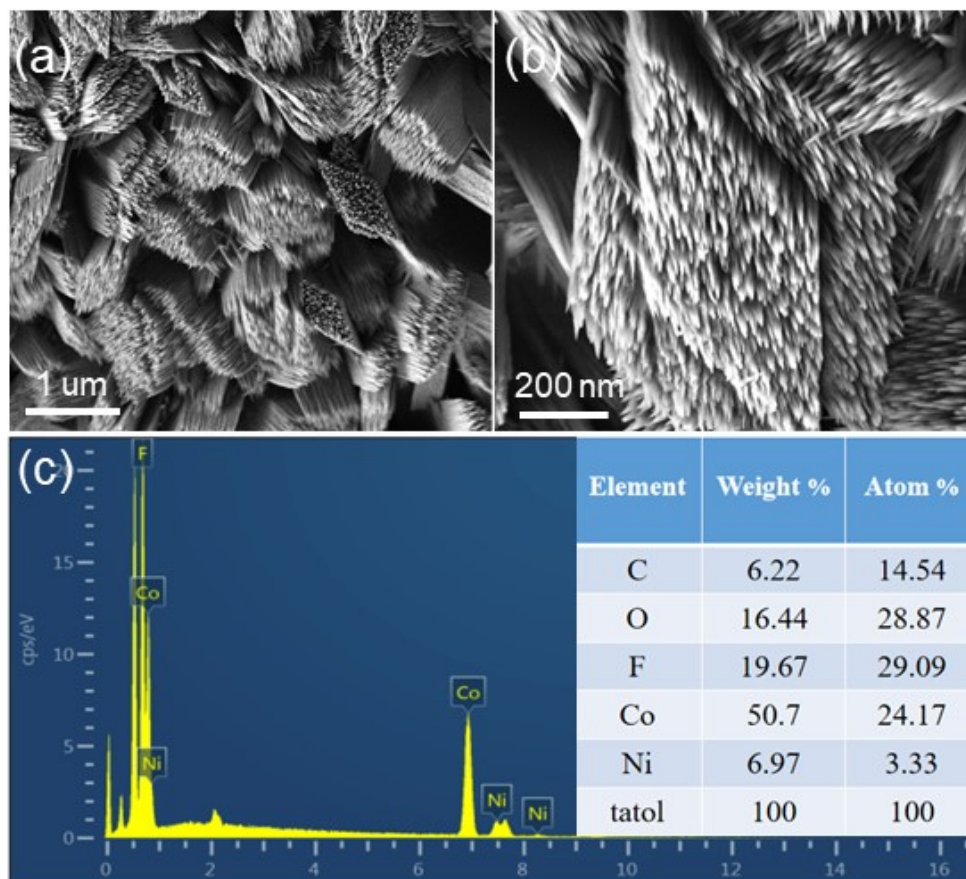

**Figure S2.** (a) low- resolution and (b) high- resolution SEM images of Co(OH)F. (b)

EDS spectrum of Co(OH)F

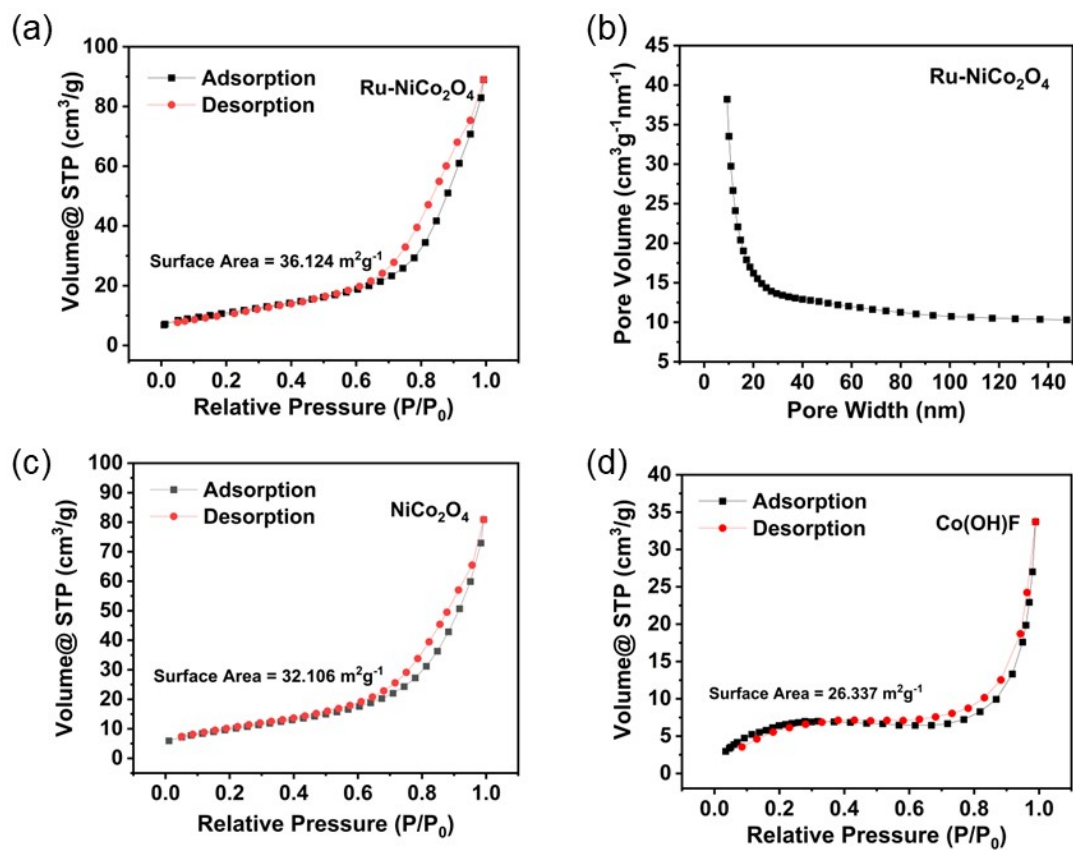

**Figure S3.** Nitrogen adsorption-desorption isotherms of (a) Ru-NiCo<sub>2</sub>O<sub>4</sub> and (b) The image of corresponding pore size distribution, (c) NiCo<sub>2</sub>O<sub>4</sub>, (d) Co(OH)F.



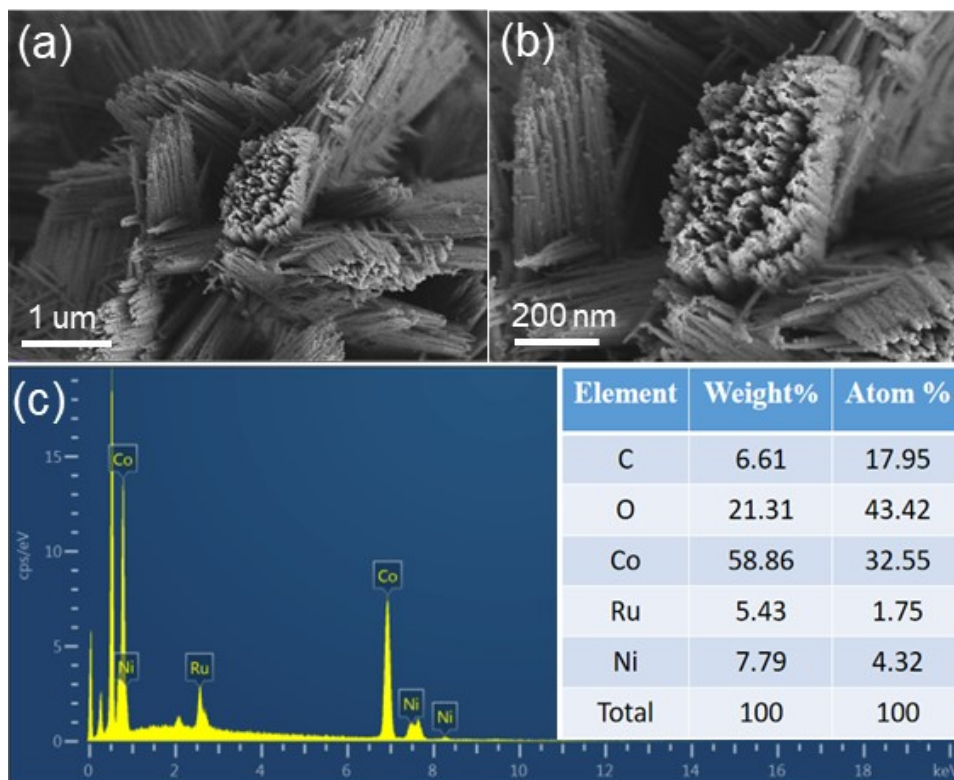

**Figure S4.** (a) low-resolution, (b) high-resolution SEM images and (c) EDS spectrum of Ru-NiCo<sub>2</sub>O<sub>4</sub>.

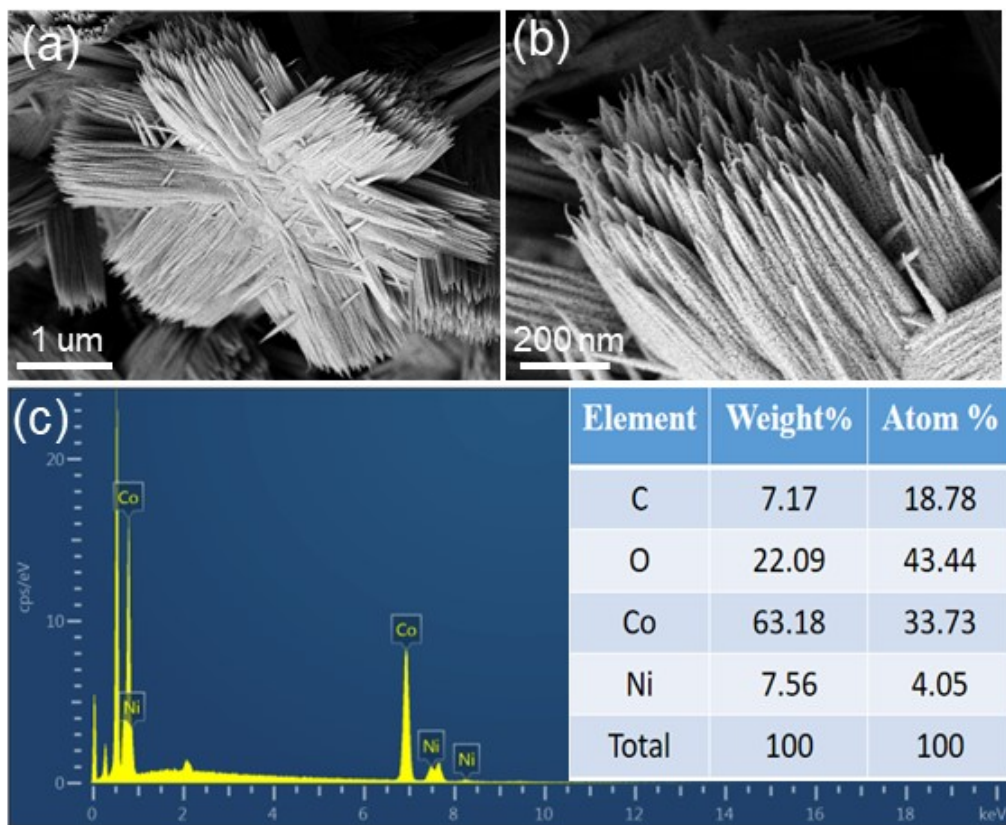

**Figure S5.** (a) low- resolution and (b) high- resolution SEM images and (c) EDS spectrum of  $\text{NiCo}_2\text{O}_4$ .

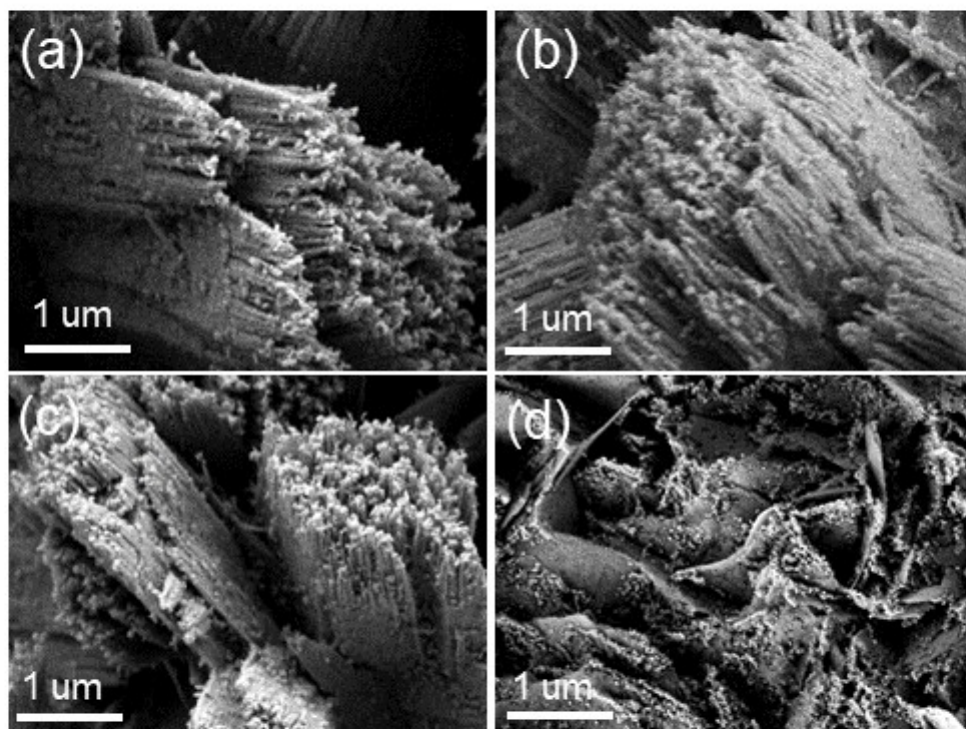

**Figure S6.** (a-d) SEM images of different Ru dosage at 0.01 M, 0.015 M, 0.025 M, and 0.03 M.

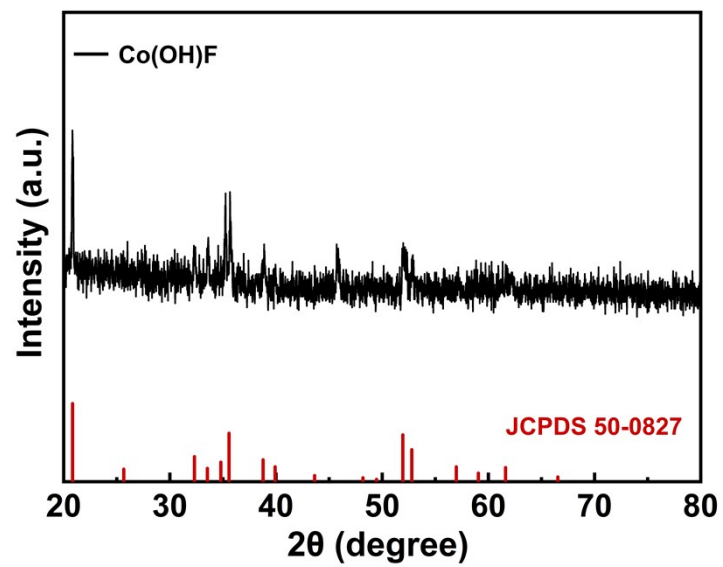

**Figure S7.** The XRD image of Co(OH)F.

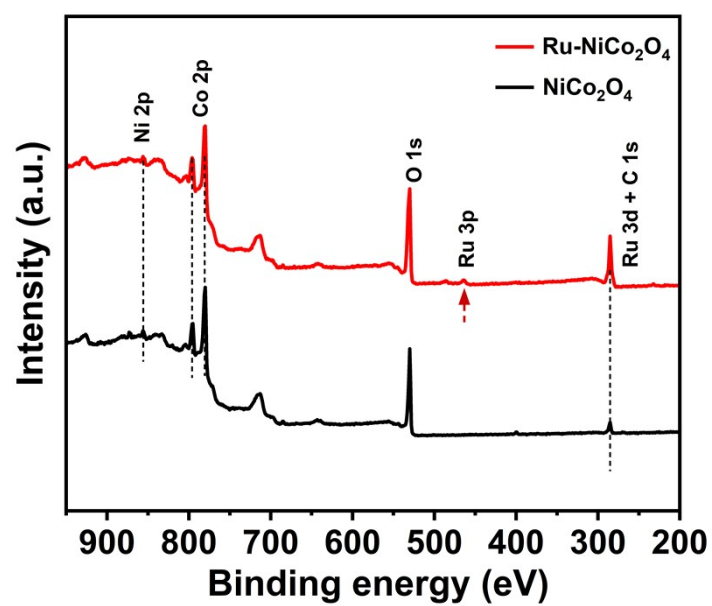

**Figure S8.** The XPS survey spectra of Ru-NiCo<sub>2</sub>O<sub>4</sub> and NiCo<sub>2</sub>O<sub>4</sub>.

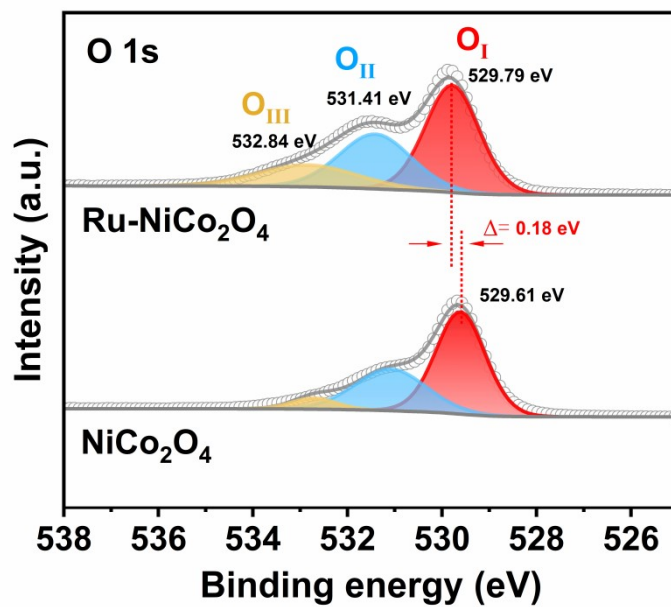

**Figure S9.** The XPS spectrum of O 1s in  $Ru-NiCo_2O_4$  and  $NiCo_2O_4$ .

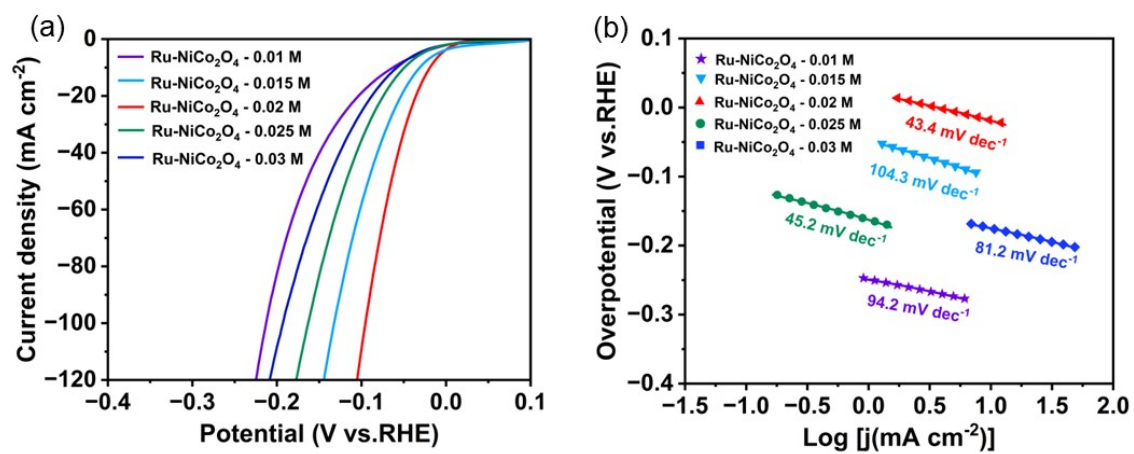

**Figure S10.** (a) the linear-sweep voltammetry (LSV) polarization-curves (b) the Tafel slope of Ru-NiCo<sub>2</sub>O<sub>4</sub> with different concentration.

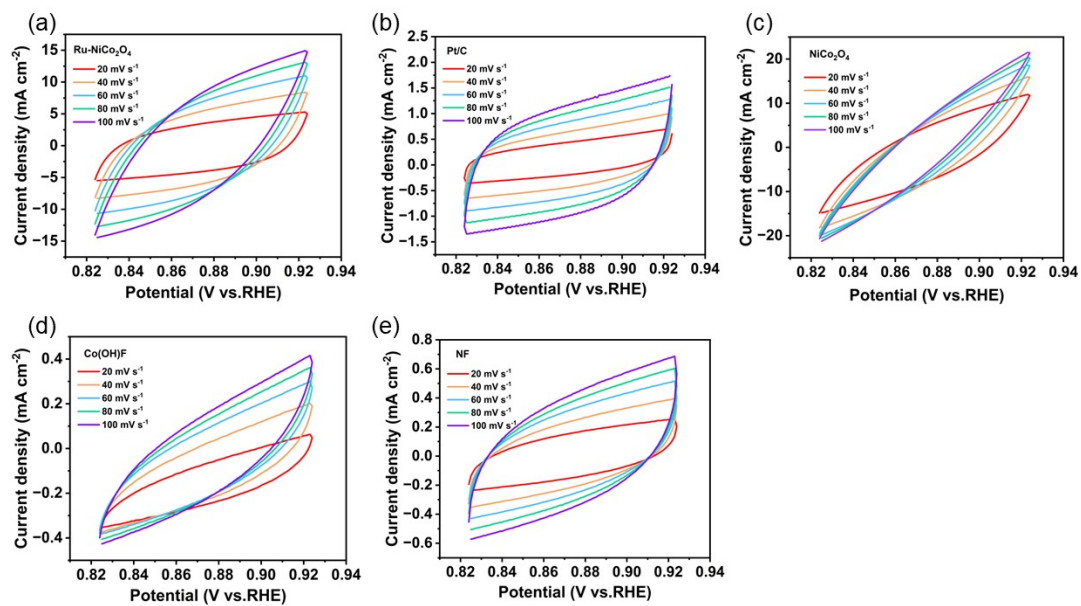

**Figure S11.** CV curves of the catalysts recorded in the region of 0.824-0.924 V for HER in 1 M KOH. (a) Ru-NiCo<sub>2</sub>O<sub>4</sub>, (b) Pt/C, (c) NiCo<sub>2</sub>O<sub>4</sub>, (d) Co(OH)F, (e) NF.



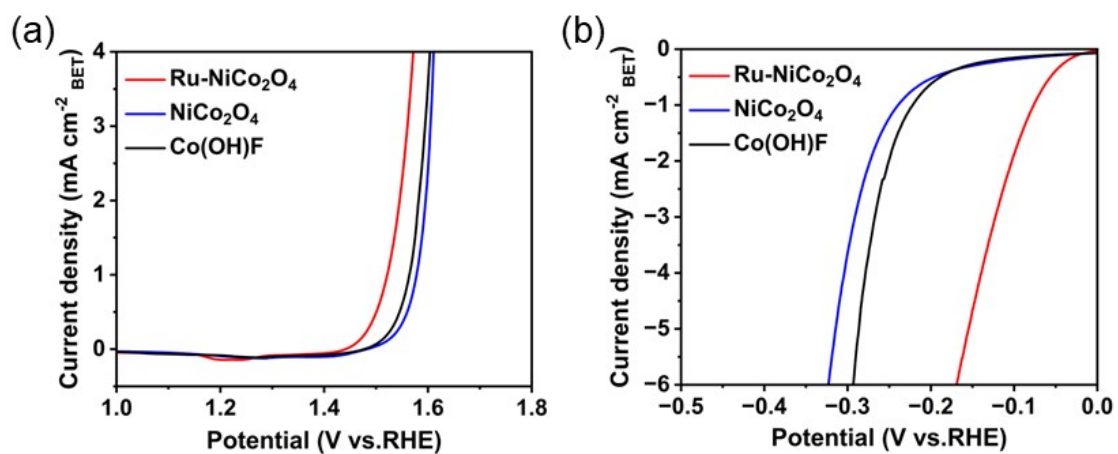

**Figure S12.** The normalized LSV curve for HER (a) and OER (b) of Ru-NiCo<sub>2</sub>O<sub>4</sub>, NiCo<sub>2</sub>O<sub>4</sub> and Co(OH)F based on the BET surface area.

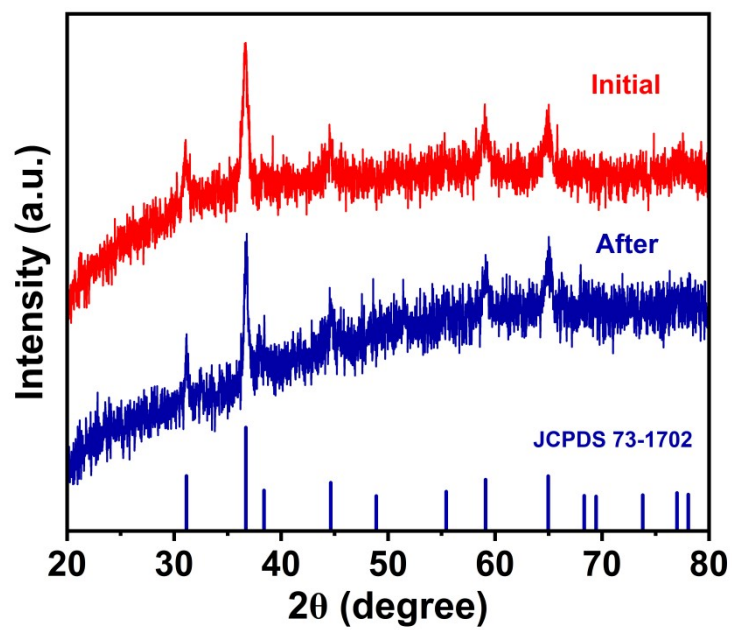

**Figure S13.** XRD of the Ru-NiCo<sub>2</sub>O<sub>4</sub> catalyst after HER stability.

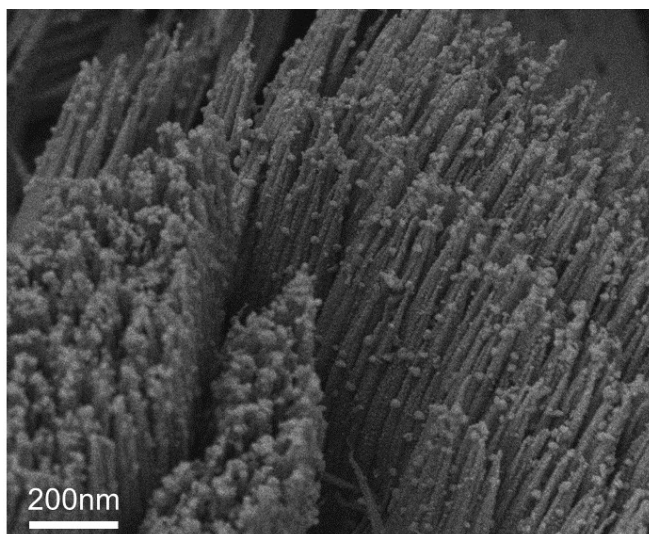

**Figure S14.** SEM of the Ru-NiCo<sub>2</sub>O<sub>4</sub> catalyst after HER stability.

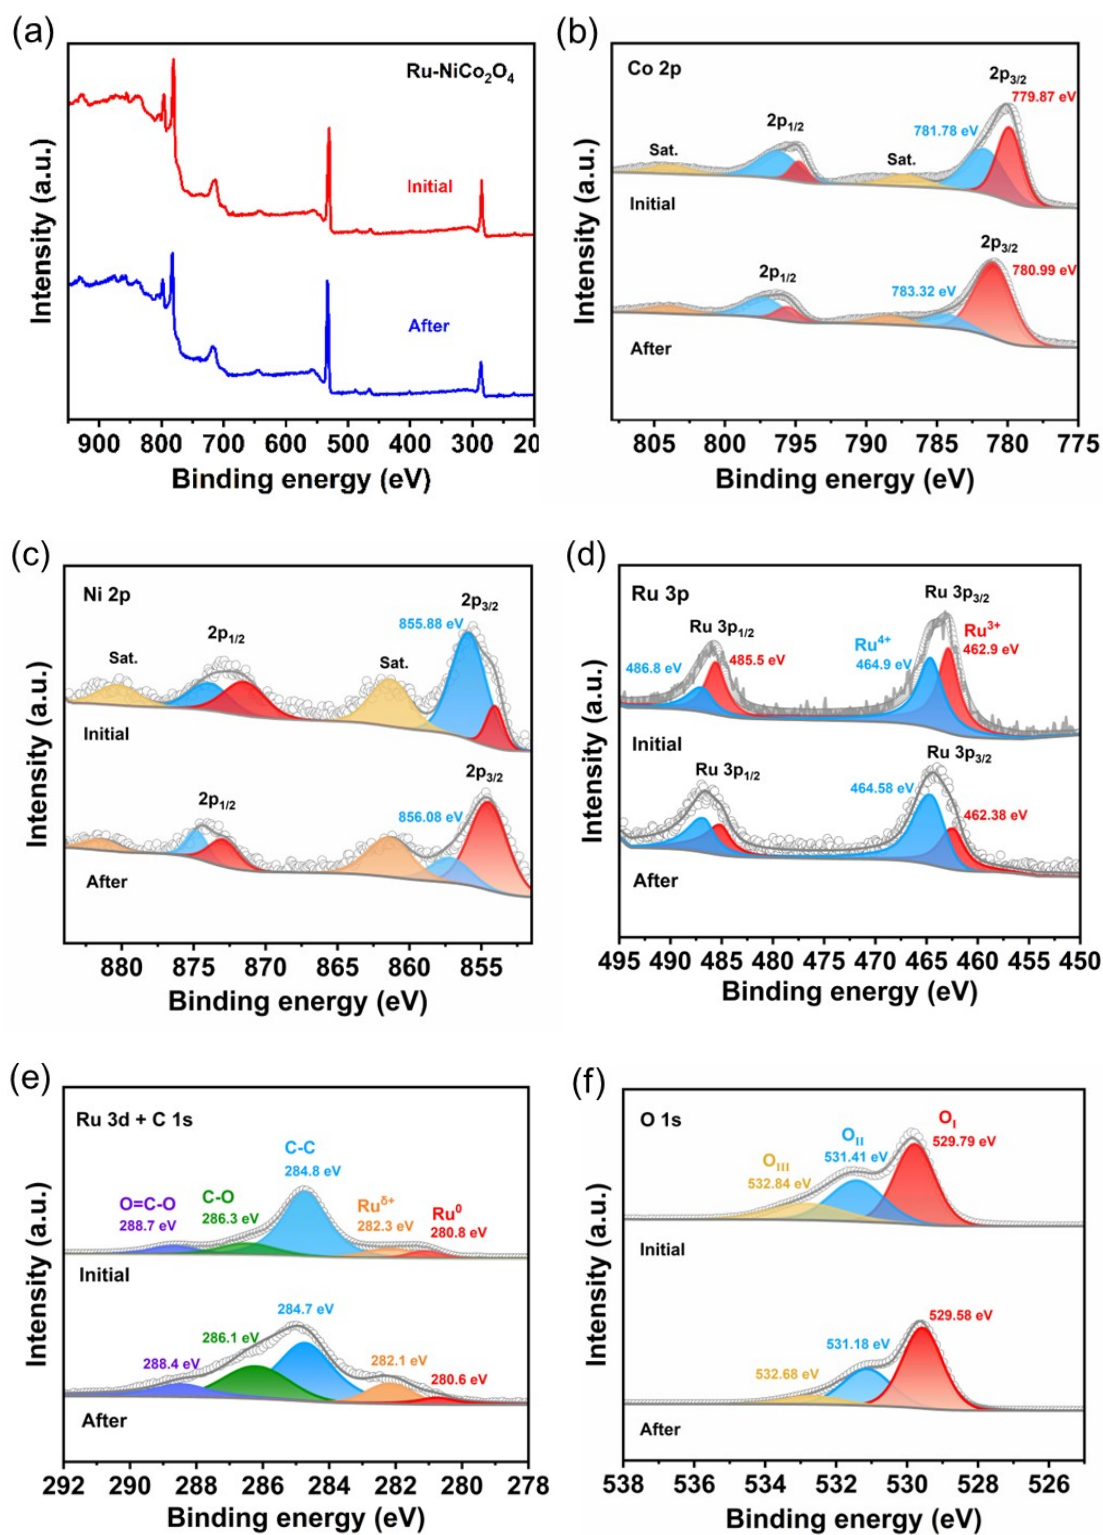

Figure S15. XPS of the Ru-NiCo<sub>2</sub>O<sub>4</sub> catalyst after HER stability.

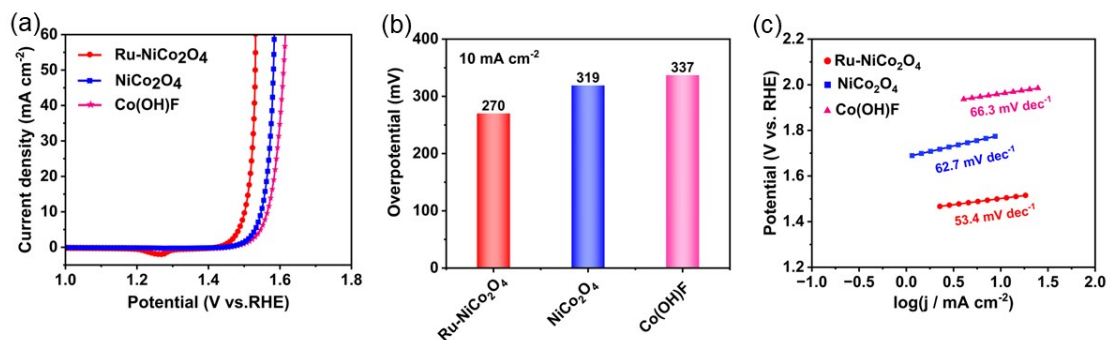

**Figure S16.** OER activities of the as-prepared catalysts in 1 M KOH. (a) LSV curves at a slow scan rate ( $0.1 \text{ mV s}^{-1}$ ), (b) the overpotentials of different electrodes required for  $10 \text{ mA cm}^{-2}$  current density, (c) Tafel plots.

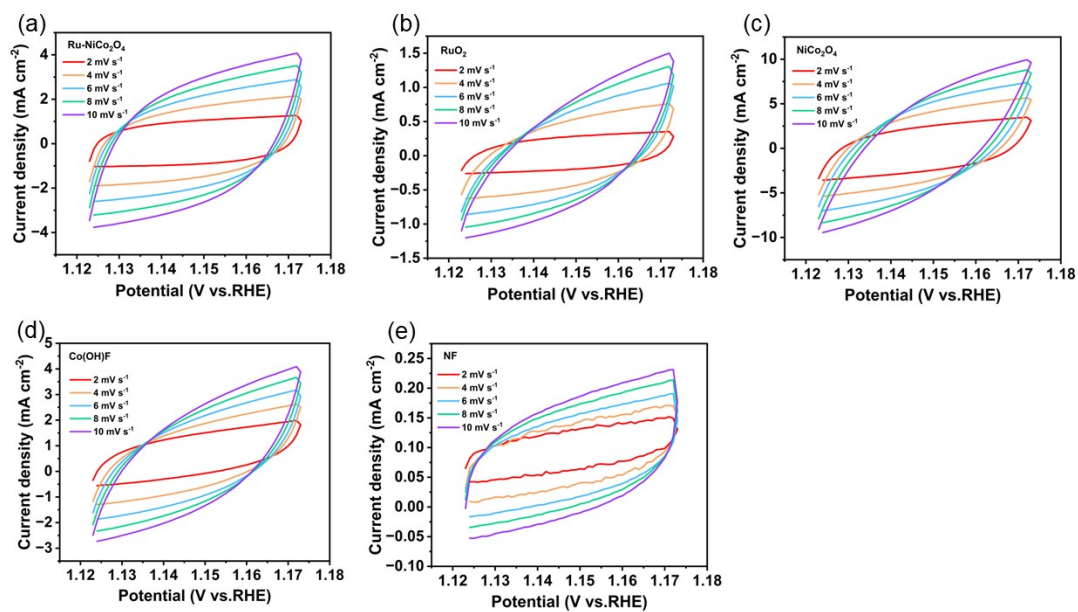

**Figure S17.** CV curves of the catalysts recorded in the region of 1.123V-1.173V for OER in 1 M KOH. (a) Ru-NiCo<sub>2</sub>O<sub>4</sub>, (b) RuO<sub>2</sub>, (c) NiCo<sub>2</sub>O<sub>4</sub>, (d) Co(OH)F, (e) NF.

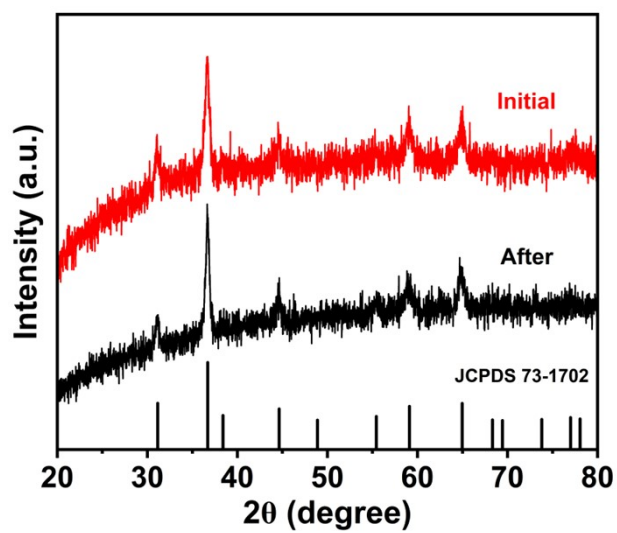

**Figure S18.** XRD of the Ru-NiCo<sub>2</sub>O<sub>4</sub> catalyst after OER stability.

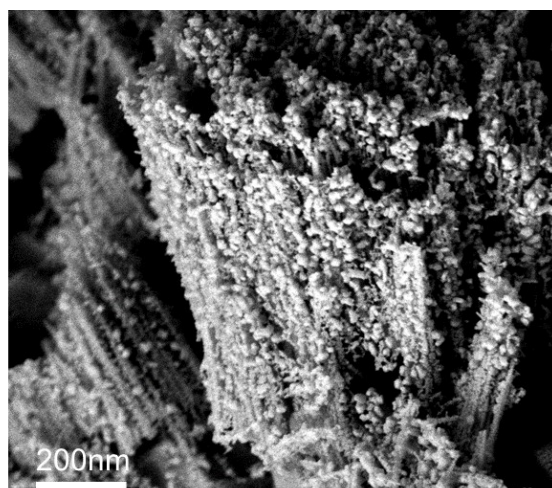

**Figure S19.** SEM of the Ru-NiCo<sub>2</sub>O<sub>4</sub> catalyst after OER stability.

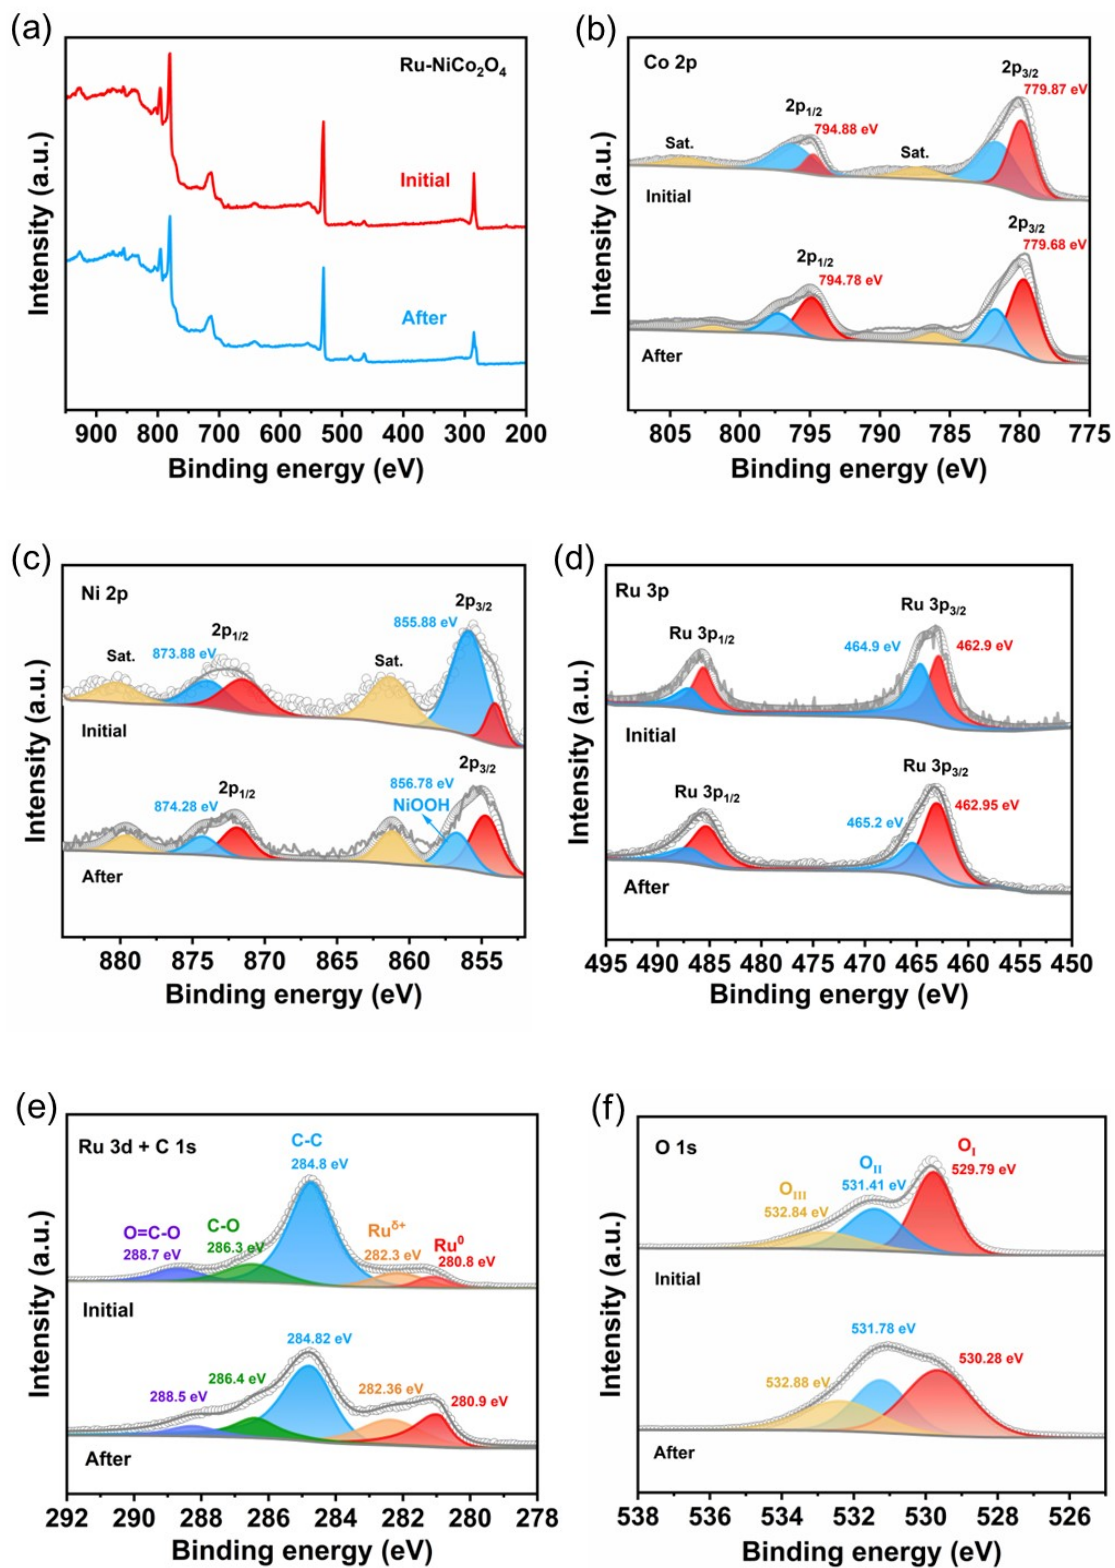

Figure S20. XPS of the Ru-NiCo<sub>2</sub>O<sub>4</sub> catalyst after OER stability.

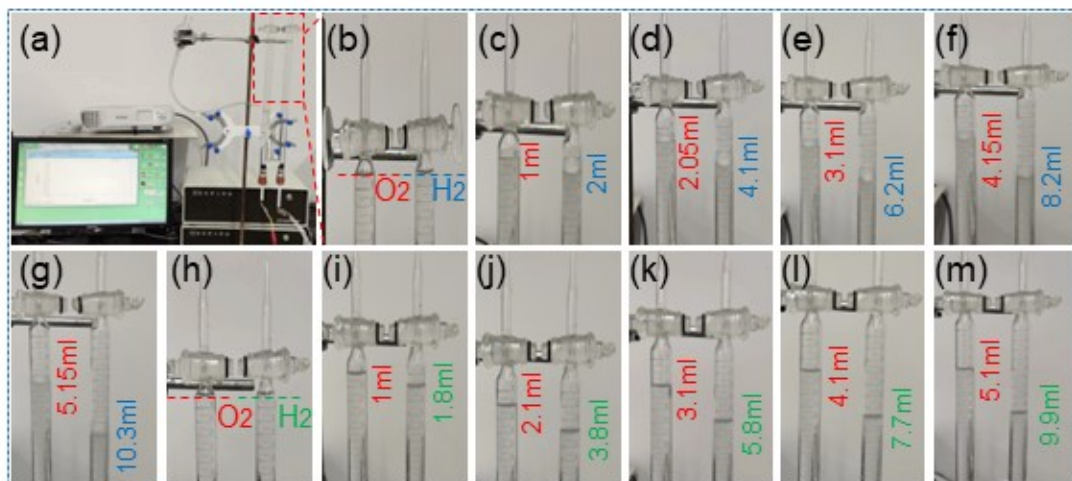

**Figure S21.** Overall water splitting was performed in an improved Hoffman water electrolyzer (a); Corresponding levels of H<sub>2</sub> (blue) and O<sub>2</sub> (red) gases generated at different times of 0 min (b), 5 min (c); 10 min (d); 15 min (e); 20 min (f); 25 min (g) for Ru-NiCo<sub>2</sub>O<sub>4</sub>. H<sub>2</sub> (green) and O<sub>2</sub> (red) gases generated at 0 min (h); 5 min (i); 10 min (j); 15 min (k); 20 min (l); 25 min (m) for NiCo<sub>2</sub>O<sub>4</sub>.



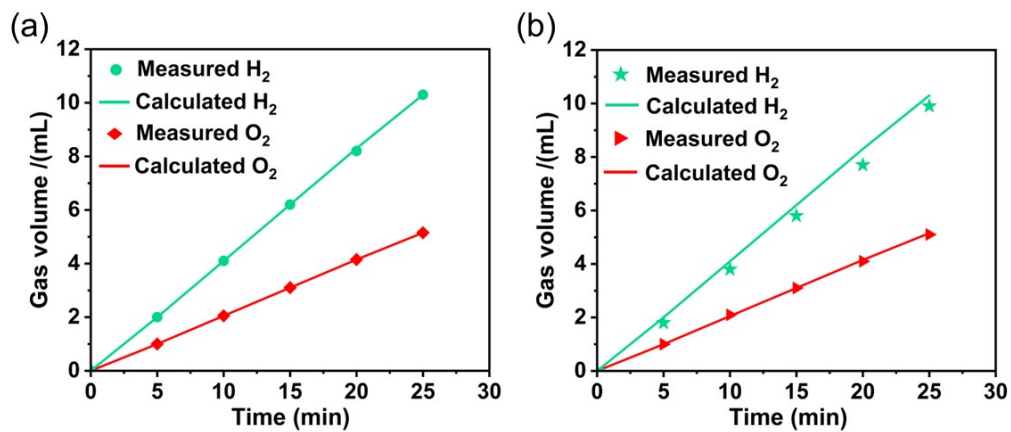

**Figure S22.** Experimental and theoretical volumes of the generated H<sub>2</sub> and O<sub>2</sub> by the (a) Ru-NiCo<sub>2</sub>O<sub>4</sub>, (b) NiCo<sub>2</sub>O<sub>4</sub> electrode in a Hoffman water electrolyzer at a current density of 50 mA cm<sup>-2</sup>.

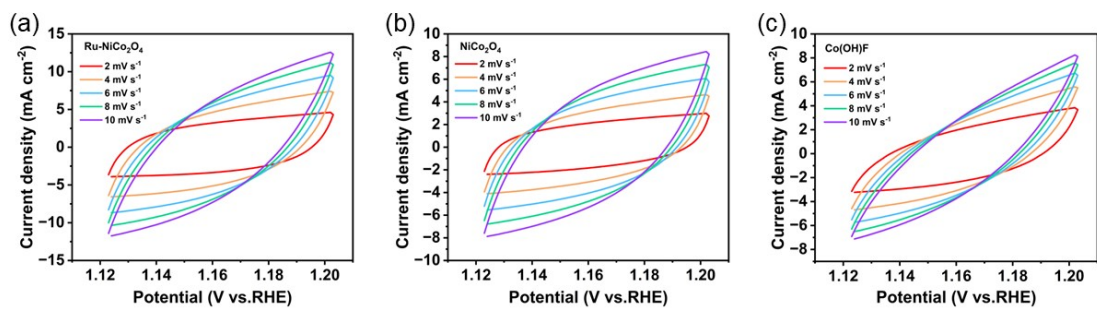

**Figure S23.** CV curves of the catalysts recorded in the region of 1.123V-1.203V for UOR in 1 M KOH containing 0.33 M urea.

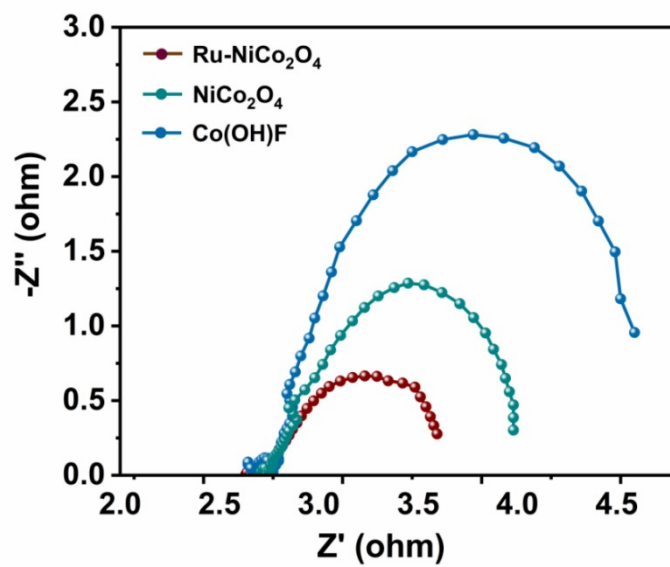

**Figure S24.** EIS Nyquist plots of the as prepared Ru-NiCo<sub>2</sub>O<sub>4</sub>, NiCo<sub>2</sub>O<sub>4</sub>, Co(OH)F catalysts in 1 M KOH containing 0.33 M urea.

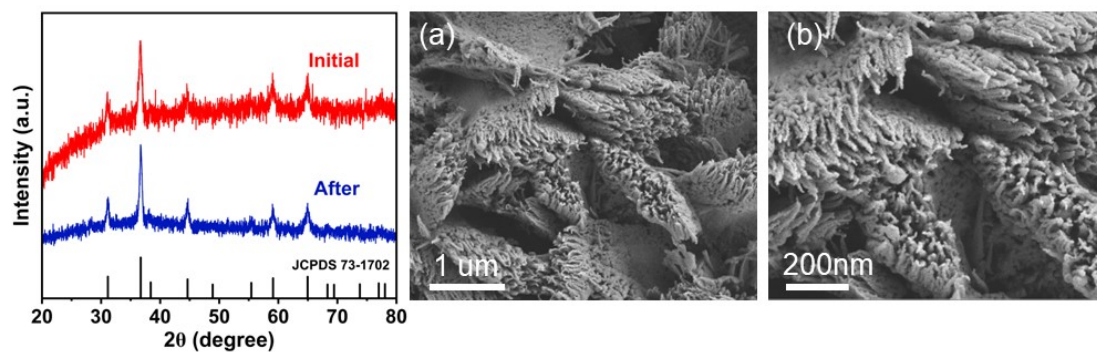

**Figure S25.** XRD, (a) low-resolution and (b) high-resolution SEM images of Ru-NiCo<sub>2</sub>O<sub>4</sub> catalyst after UOR stability.

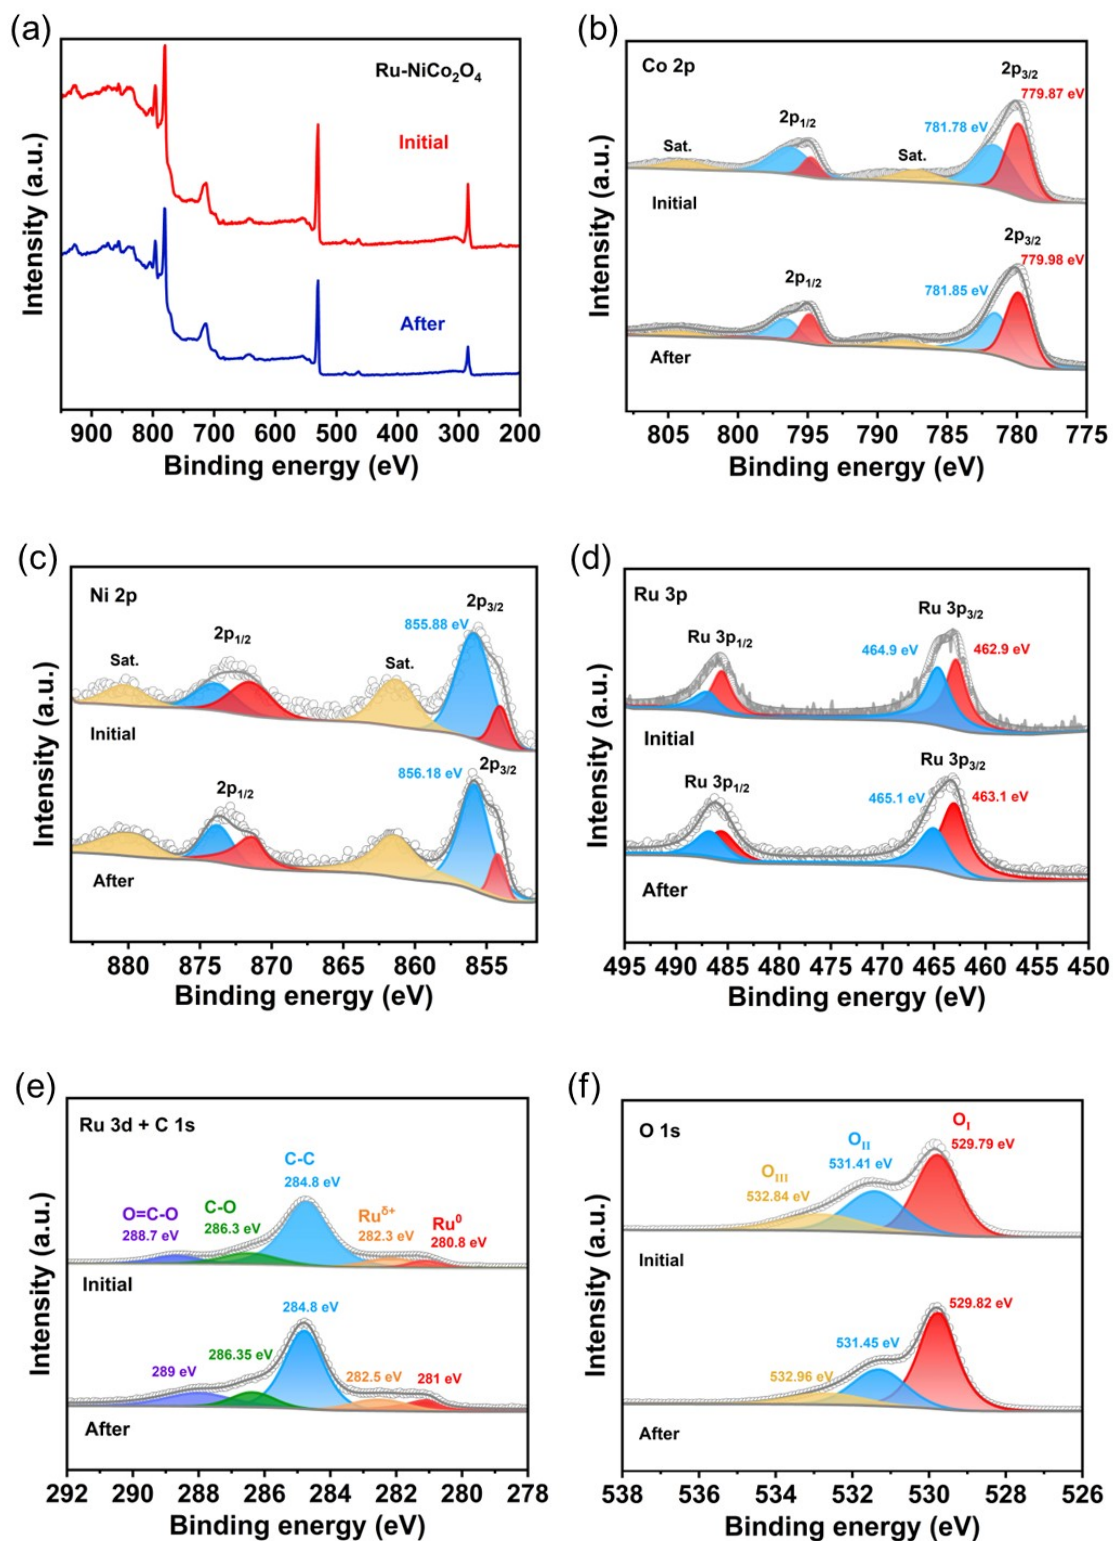

Figure S26. XPS of the Ru-NiCo<sub>2</sub>O<sub>4</sub> catalyst after UOR stability.

**Table S1.** ICP-OES results of Ru-NiCo<sub>2</sub>O<sub>4</sub> and NiCo<sub>2</sub>O<sub>4</sub> catalysts.

| Catalysts                                 | ICP (wt. %) |     |     |      |
|-------------------------------------------|-------------|-----|-----|------|
|                                           | Co          | Ni  | Ru  | O    |
| Ru-NiCo <sub>2</sub> O <sub>4</sub> -0.02 | 61.1        | 6.8 | 1.4 | 30.7 |
| NiCo <sub>2</sub> O <sub>4</sub>          | 61.8        | 7.1 | 0   | 31.1 |

**Table S2.** The content of Ru in in different Ru-NiCo<sub>2</sub>O<sub>4</sub> catalysts measured from by ICP-OES.

| <b>Samples</b>                             | <b>content of Ru (wt. %)</b> |
|--------------------------------------------|------------------------------|
| Ru-NiCo <sub>2</sub> O <sub>4</sub> -0.01  | 0.3%                         |
| Ru-NiCo <sub>2</sub> O <sub>4</sub> -0.015 | 0.8%                         |
| Ru-NiCo <sub>2</sub> O <sub>4</sub> -0.020 | 1.4%                         |
| Ru-NiCo <sub>2</sub> O <sub>4</sub> -0.025 | 3.7%                         |
| Ru-NiCo <sub>2</sub> O <sub>4</sub> -0.03  | 8.2%                         |

**Table S3.** TOFs of Ru-NiCo<sub>2</sub>O<sub>4</sub> and NiCo<sub>2</sub>O<sub>4</sub> catalysts in HER and OER process.

| <b>Samples</b>                  | <b>Ru-NiCo<sub>2</sub>O<sub>4</sub></b>               | <b>NiCo<sub>2</sub>O<sub>4</sub></b>                  |
|---------------------------------|-------------------------------------------------------|-------------------------------------------------------|
| n (mol)                         | $2.31 \times 10^{-6}$                                 | $3.953 \times 10^{-6}$                                |
| <b>HER (100 mV)</b>             | $j = 6.24 \times 10^{-2} \text{ (A cm}^{-2}\text{)}$  | $j = 2.472 \times 10^{-3} \text{ (A cm}^{-2}\text{)}$ |
| <b>OER (300 mV)</b>             | $j = 8.268 \times 10^{-2} \text{ (A cm}^{-2}\text{)}$ | $j = 9.832 \times 10^{-3} \text{ (A cm}^{-2}\text{)}$ |
| <b>HER TOF (s<sup>-1</sup>)</b> | $1.399 \times 10^{-1}$                                | $3.24 \times 10^{-3}$                                 |
| <b>OER TOF (s<sup>-1</sup>)</b> | $9.27 \times 10^{-2}$                                 | $6.433 \times 10^{-3}$                                |



**Table S4.** Comparison of HER performance for Ru-NiCo<sub>2</sub>O<sub>4</sub> with the recently reported transitional metal-catalysts in 1 M KOH solution.

| Catalysts                                                          | $\eta = 10 \text{ mA cm}^{-2}$<br>/mV | Tafel slope<br>mV/dec | Mass loading<br>(mg/cm <sup>2</sup> ) | References                                    |
|--------------------------------------------------------------------|---------------------------------------|-----------------------|---------------------------------------|-----------------------------------------------|
| <b>Ru-NiCo<sub>2</sub>O<sub>4</sub></b>                            | <b>25</b>                             | <b>43.4</b>           | <b>0.73</b>                           | <b>This work</b>                              |
| S-Co <sub>2</sub> P@Ni <sub>2</sub> P                              | 43                                    | 58.7                  | 2.1                                   | Chem. Eng. J. 439 (2022) 135743               |
| NiCo <sub>2</sub> O <sub>4</sub> /Ni <sub>2</sub> P                | 45                                    | 45                    | 1.58                                  | Adv. Mater. Interfaces 4 (2017) 1700481.      |
| P-Ru-CoNi-LDH                                                      | 29                                    | 69                    | N.A.                                  | Small., 2022, 18, 2104323                     |
| RuNi <sub>1</sub> Co <sub>1</sub> @CMT                             | 78                                    | 77                    | 1.6                                   | J. Colloid Interf. Sci. 612 (2022) 710-721    |
| Ru-NiCoP                                                           | 32.2                                  | 61                    | N.A.                                  | J. Colloid Interf. Sci. 612 (2022) 710-721    |
| P-CoNi <sub>2</sub> S <sub>4</sub>                                 | 84                                    | 91                    | 14.8                                  | Appl. Surf. Sci. 610 (2022) 213-220           |
| Ru-Ni <sub>3</sub> N@NC                                            | 43                                    | 70                    | N.A.                                  | Int. J. Hydrogen Energy 47 (2022) 25081-25089 |
| Ru/Co <sub>4</sub> N-CoF <sub>2</sub>                              | 53                                    | 144.1                 | 3.5                                   | Chem. Eng. J. 414 (2021) 128865               |
| MSOR <sub>1</sub>                                                  | 43                                    | 63.1                  | N.A.                                  | Adv. Funct. Mater. 33 (2023) 2210939          |
| MH-TMO                                                             | 70                                    | 97.9                  | 2.1                                   | Adv. Energy Mater. 12 (2022) 2200067          |
| NiCo foam                                                          | 86                                    | 62.1                  | N.A.                                  | Appl. Catal. B-Environ. 288 (2021) 120002     |
| CoMoNx-500 NSAs/NF                                                 | 91                                    | 70.3                  | 1.35                                  | Chem. Eng. J. 411 (2021) 128433               |
| Fe-Ni <sub>3</sub> S <sub>2</sub> @FeNi <sub>3</sub>               | 105                                   | 69                    | 0.82                                  | Chem. Eng. J. 396 (2020) 125315               |
| NiCo <sub>2</sub> O <sub>4</sub> @NiMo <sub>2</sub> S <sub>4</sub> | 159                                   | 53.1                  | 2.4                                   | Adv. Mater. Interfaces 6 (2019) 1901308       |
| NiCoFe-PS                                                          | 97.8                                  | 51.8                  | N.A.                                  | Small 15 (2019) 1905201                       |

N.A. represents the unknown data.

**Table S5.** Comparison of the performance for Ru-NiCo<sub>2</sub>O<sub>4</sub> with the recently reported UOR electrocatalysts in 1 M KOH solution with 0.33 M urea.

| Catalysts                                                                | Potential (V) at<br>J=10 mA cm <sup>-2</sup> | Tafel slope<br>mV/dec | Mass loading<br>(mg/cm <sup>2</sup> ) | References                                      |
|--------------------------------------------------------------------------|----------------------------------------------|-----------------------|---------------------------------------|-------------------------------------------------|
| <b>Ru-NiCo<sub>2</sub>O<sub>4</sub></b>                                  | <b>1.316</b>                                 | <b>47.7</b>           | <b>0.73</b>                           | <b>This work</b>                                |
| Ce-Ni <sub>2</sub> P                                                     | 1.406                                        | 53.7                  | 1                                     | J. Alloys Compd. 912 (2022) 165234              |
| NiFeMo                                                                   | 1.38                                         | 43.3                  | N.A.                                  | Appl. Surf. Sci. 552 (2021) 149514              |
| Fe-Ni <sub>3</sub> S <sub>2</sub> @FeNi <sub>3</sub> -8                  | 1.4                                          | 29                    | 0.82                                  | Chem. Eng. J. 396 (2020) 125315                 |
| NiMoSe/NF                                                                | 1.39                                         | 43.3                  | N.A.                                  | Int. J. Hydrogen Energy., 46 (2021) 37792-37801 |
| P-NiFeOxHy                                                               | 1.37                                         | 72.6                  | 6.5                                   | J. Colloid Interface Sci. 631 (2023) 56-65      |
| V-Ni <sub>3</sub> N/NF                                                   | 1.361                                        | N.A.                  | N.A.                                  | J. Mater. Chem. A 9 (2021) 4159-4166            |
| NiF <sub>3</sub> /Ni <sub>2</sub> P@CC-2                                 | 1.36                                         | 4                     | 33                                    | Chem. Eng. J. 427 (2022) 130865.                |
| 4-Ni/CS                                                                  | 1.369                                        | 39                    | 0.35                                  | New J. Chem. 47 (2023) 7399-7409                |
| S-NiMo/NF                                                                | 1.35                                         | 42                    | N.A.                                  | Appl. Surf. Sci. 600 (2022) 154116              |
| NiO-NiPi                                                                 | 1.349                                        | 70.6                  | 0.16                                  | Chem. Eng. J. 425 (2021) 130514                 |
| NiCo BMHs                                                                | 1.33                                         | 48                    | N.A.                                  | Appl. Surf. Sci. 604 (2022) 15448               |
| (Ni <sub>0.25</sub> Fe <sub>0.75</sub> ) <sub>3</sub> S <sub>2</sub> /NF | 1.38                                         | 87.8                  | 15.6                                  | ACS Appl. Energy Mater. 5 (2022) 1183-1192      |
| NiFe(OH) <sub>2</sub> -SD/NF                                             | 1.32                                         | 62                    | N.A.                                  | J. Colloid Interface Sci. 557 (2019) 10-17      |

N.A. represents the unknown data.

**Table S6.** Comparison of cell voltage for urea electrolysis of the Ru-NiCo<sub>2</sub>O<sub>4</sub> with previous work.

| Catalysts                                                | Cell voltage (V) at<br>J=10 mA cm <sup>-2</sup> | Mass loading<br>(mg/cm <sup>2</sup> ) | References                                           |
|----------------------------------------------------------|-------------------------------------------------|---------------------------------------|------------------------------------------------------|
| <b>Ru-NiCo<sub>2</sub>O<sub>4</sub></b>                  | <b>1.427</b>                                    | <b>0.73</b>                           | <b>This work</b>                                     |
| V-FeNi <sub>3</sub> N/Ni <sub>3</sub> N                  | 1.46                                            | N.A.                                  | ACS Appl. Mater. Interfaces<br>13 (2021) 57392-57402 |
| Fe, V-NiS/NF                                             | 1.45                                            | 5.82                                  | J. Ind. Eng. Chem. 113 (2022)<br>170-180.            |
| Fe-Ni <sub>3</sub> S <sub>2</sub> @FeNi <sub>3</sub> -8  | 1.5                                             | 0.82                                  | Chem. Eng. J. 396 (2020)<br>125315                   |
| NiFeSbP/GB                                               | 1.54                                            | N.A.                                  | ACS Appl. Energy Mater. 5<br>(2022) 15689-15700      |
| Rh-Ni                                                    | 1.44                                            | 2                                     | J. Power Sources 196 (2011)<br>9579-9584             |
| CoMn/CoMn <sub>2</sub> O <sub>4</sub>                    | 1.51                                            | 3                                     | Adv. Funct. Mater. 30 (2020)<br>2000556              |
| NiCo alloy                                               | 1.53                                            | 10                                    | Sci. Rep. 4 (2014) 5863                              |
| MoO <sub>2</sub> -MoO <sub>3</sub> /Ni <sub>2</sub> P/NF | 1.44                                            | N.A.                                  | J. Colloid Interface Sci. 614<br>(2022) 337-344      |
| NF@Acid-H <sub>2</sub>                                   | 1.49                                            | 0.5                                   | Appl. Surf. Sci., 496 (2019)<br>143710               |
| Fe-doped NiS–NiS <sub>2</sub>                            | 1.55                                            | 1                                     | Small 18 (2022) 2106841                              |
| Ni <sub>9</sub> S <sub>8</sub> /CuS/Cu <sub>2</sub> O    | 1.47                                            | N.A.                                  | Int. J. Hydrogen Energy. 46<br>(2021) 20950-20960    |
| Ni <sub>3</sub> N NA/CC                                  | 1.44                                            | 1.90                                  | Inorg. Chem. Front. 4 (2017)<br>1120-1124            |
| S-NiMo/NF                                                | 1.574                                           | N.A.                                  | Appl. Surf. Sci. 600 (2022)<br>154116                |

N.A. represents the unknown data.
